# Supplementary material for: miR319, miR390, and miR393 Are Involved in Aluminum Response in Flax (Linum usitatissimum L.)
Source: Biomed Res Int. 2017 Feb 19;2017:4975146. doi: 10.1155/2017/4975146 (PMC5337325; doi:10.1155/2017/4975146)
Supplement: Supplementary file 3 [file 4975146.f3.xlsx]

## Sheet: Suppl table 3 psRNATarget
Supplementary Table 3. Target prediction for flax miRNAs using psRNA Target server.
JGI Genome portal
miRNA_Acc.	Target_Acc.	Expectation	UPE	miRNA_start	miRNA_end	Target_start	Target_end	miRNA_aligned_fragment	Target_aligned_fragment	Inhibition	Target_Desc.	Multiplicity
miR319
CUUGGACUGAAGGGAGCUCCCU	Lus10006981	2.5	19.079	1	21	203	223	CUUGGACUGAAGGGAGCUCCC	GGGAGCUCCCUUUAGUUUGGG	Cleavage	CAP (Cysteine-rich secretory proteins, Antigen 5, and Pathogenesis-related 1 protein) superfamily protein	1
CUUGGACUGAAGGGAGCUCCCU	Lus10036103	2.5	21.524	1	20	933	952	CUUGGACUGAAGGGAGCUCC	GGAGCUCCCUUCACUCCAAU	Cleavage	MYB65 myb domain protein 65	1
CUUGGACUGAAGGGAGCUCCCU	Lus10008685	2.5	19.994	1	20	969	988	CUUGGACUGAAGGGAGCUCC	GGAGCUCCCUUCACUCCAAU	Cleavage	MYB65 myb domain protein 65	1
CUUGGACUGAAGGGAGCUCCCU	Lus10026142	2.5	22.073	1	20	2502	2521	CUUGGACUGAAGGGAGCUCC	GGAGCUCCCUUCACUCCAAU	Cleavage	MYB65 myb domain protein 65	1
CUUGGACUGAAGGGAGCUCCCU	Lus10005256	2.5	23.634	1	20	590	609	CUUGGACUGAAGGGAGCUCC	GGAGCUCCGUUCGGUUCGAG	Cleavage	AATP1 AAA-ATPase 1	1
CUUGGACUGAAGGGAGCUCCCU	Lus10002195	3.0	11.872	1	20	62	81	CUUGGACUGAAGGGAGCUCC	GGGGUCCCCUUCAGUCCAAU	Cleavage	TCP3 TEOSINTE BRANCHED 1, cycloidea and PCF transcription factor 3	1
CUUGGACUGAAGGGAGCUCCCU	Lus10000463	3.0	15.876	1	20	860	879	CUUGGACUGAAGGGAGCUCC	GGGGUCCCCUUCAGUCCAAU	Cleavage	TCP4 TCP family transcription factor 4	1
CUUGGACUGAAGGGAGCUCCCU	Lus10001797	3.0	20.625	1	20	491	510	CUUGGACUGAAGGGAGCUCC	GGGCCUCCCUCCAGUUCAAG	Translation	NEF1 no exine formation 1	1
CUUGGACUGAAGGGAGCUCCCU	Lus10038666	3.0	23.135	1	22	1297	1318	CUUGGACUGAAGGGAGCUCCCU	AAGGAACUCCAUUCUGUCCAAG	Cleavage	Galactose oxidase/kelch repeat superfamily protein	1
CUUGGACUGAAGGGAGCUCCCU	Lus10037933	3.0	20.642	1	22	1489	1510	CUUGGACUGAAGGGAGCUCCCU	AAGGAACUCCAUUCUGUCCAAG	Cleavage	Galactose oxidase/kelch repeat superfamily protein	1
miR393
UCCAAAGGGAUCGCAUUGAUUU	Lus10031991	1.5	20.818	1	22	1108	1129	UCCAAAGGGAUCGCAUUGAUUU	GAGACAAUGCGAUCCCUUUGGA	Cleavage	AFB2 auxin signaling F-box 2	1
UCCAAAGGGAUCGCAUUGAUUU	Lus10035160	1.5	20.46	1	22	1498	1519	UCCAAAGGGAUCGCAUUGAUUU	GAGACAAUGCGAUCCCUUUGGA	Cleavage	AFB2 auxin signaling F-box 2	1
UCCAAAGGGAUCGCAUUGAUUU	Lus10015722	3.0	23.859	1	20	31	50	UCCAAAGGGAUCGCAUUGAU	GUCACUGCUGUCCCUUUGGA	Cleavage	zinc finger (C3HC4-type RING finger) family protein	1
UCCAAAGGGAUCGCAUUGAUUU	Lus10040823	3.0	23.755	1	20	2185	2204	UCCAAAGGGAUCGCAUUGAU	AUCAUCGUGAUCUCUUUGGA	Cleavage	PLL5 pol-like 5	1
miR390
AAGCUCAGGAGGGAUAGCGCC	Lus10017782	3.0	23.657	1	21	823	843	AAGCUCAGGAGGGAUAGCGCC	GGCUCUAUCCCUUCUGAGUUG	Cleavage	Leucine-rich receptor-like protein kinase family protein	1
AAGCUCAGGAGGGAUAGCGCC	Lus10029151	3.0	19.672	1	21	781	801	AAGCUCAGGAGGGAUAGCGCC	GGGGUUGUCCUUCUUGAGCUU	Cleavage	Protein kinase superfamily protein	1
AAGCUCAGGAGGGAUAGCGCC	Lus10013014	3.0	19.29	1	21	781	801	AAGCUCAGGAGGGAUAGCGCC	GGGGUUGUCCUUCUUGAGCUU	Cleavage	Protein kinase superfamily protein	1
AAGCUCAGGAGGGAUAGCGCC	Lus10009533	3.0	13.96	1	21	130	150	AAGCUCAGGAGGGAUAGCGCC	GGCCCUGUCCCUCCUGAUCUU	Cleavage	GRF5 growth-regulating factor 5	1
AAGCUCAGGAGGGAUAGCGCC	Lus10013013	3.0	19.29	1	21	1828	1848	AAGCUCAGGAGGGAUAGCGCC	GGGGUUGUCCUUCUUGAGCUU	Cleavage	RHS10 root hair specific 10	1
AAGCUCAGGAGGGAUAGCGCC	Lus10026690	2.5	12.695	1	20	50	69	AAGCUCAGGAGGGAUAGCGC	ACGCUCUCUCUCCUGAGCUU	Cleavage	PHS1 poor homologous synapsis 1	3
AAGCUCAGGAGGGAUAGCGCC	Lus10026690	2.5	12.689	1	20	164	183	AAGCUCAGGAGGGAUAGCGC	ACGCUCUCUCUCCUGAGCUU	Cleavage	PHS1 poor homologous synapsis 1	3
AAGCUCAGGAGGGAUAGCGCC	Lus10026690	2.5	12.794	1	20	278	297	AAGCUCAGGAGGGAUAGCGC	ACGCUCUCUCUCCUGAGCUU	Cleavage	PHS1 poor homologous synapsis 1	3
AAGCUCAGGAGGGAUAGCGCC	Lus10026751	3.0	14.196	1	21	310	330	AAGCUCAGGAGGGAUAGCGCC	GGAACUAUCCCUGCUGAGCUU	Translation	Leucine-rich repeat (LRR) family protein	1
L. usitatissimum unigene library
miR319
CUUGGACUGAAGGGAGCUCCCU	genolin_c20575	3.0	23.135	1	22	659	680	CUUGGACUGAAGGGAGCUCCCU	AAGGAACUCCAUUCUGUCCAAG	Cleavage	acyl-CoA-binding domain-containing protein 4	1
miR390
AAGCUCAGGAGGGAUAGCGCC	genolin_c19878	3.0	8.782	1	20	156	175	AAGCUCAGGAGGGAUAGCGC	UGUCUAUCCCUCCUGAGCUU	Cleavage	TAS3	1
